# Supplementary material for: A human polymorphism affects NEDD4L subcellular targeting by leading to two isoforms that contain or lack a C2 domain
Source: PubMed Central journal article supplement (PMC2678989; doi:10.1186/1471-2121-10-26), 2009-04-13

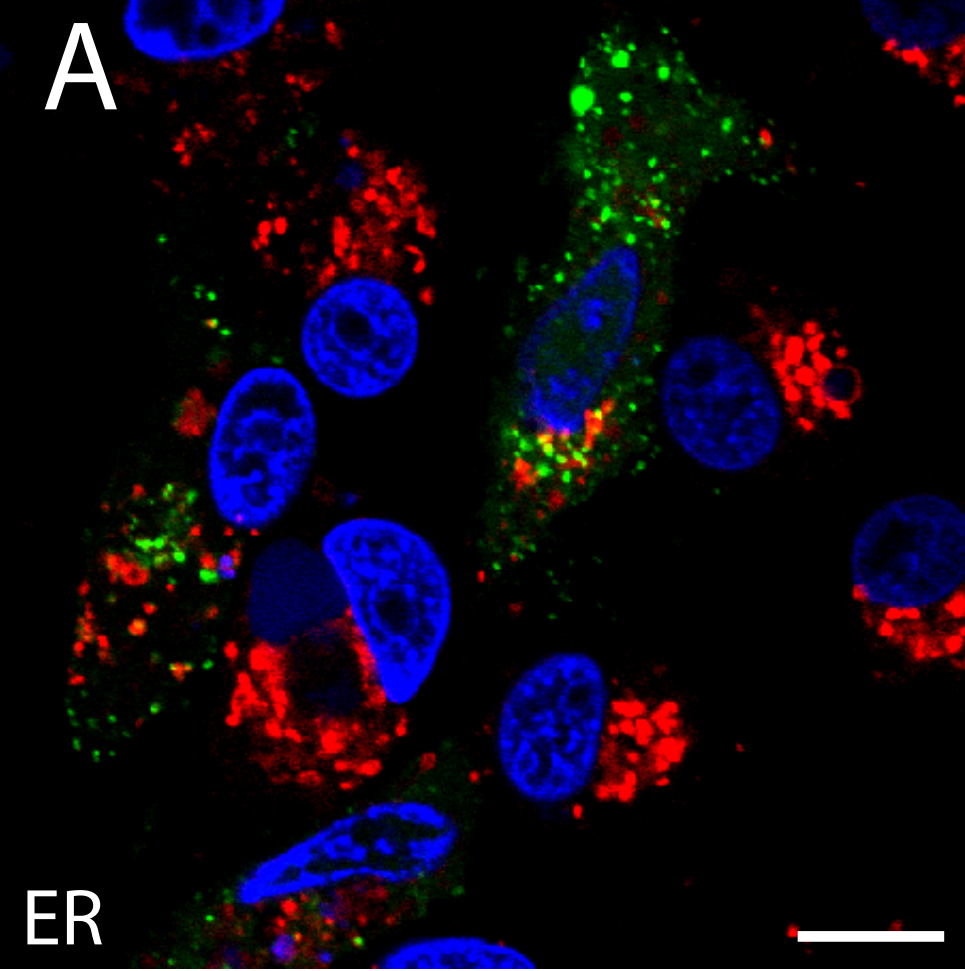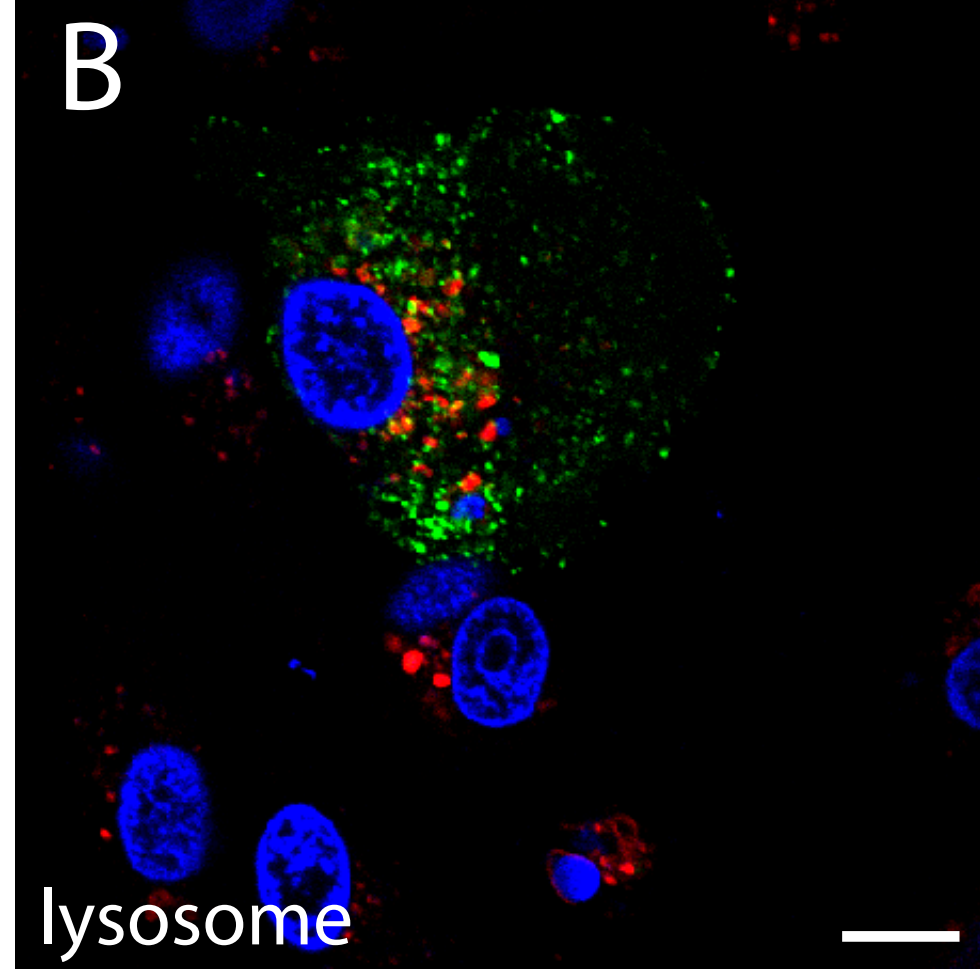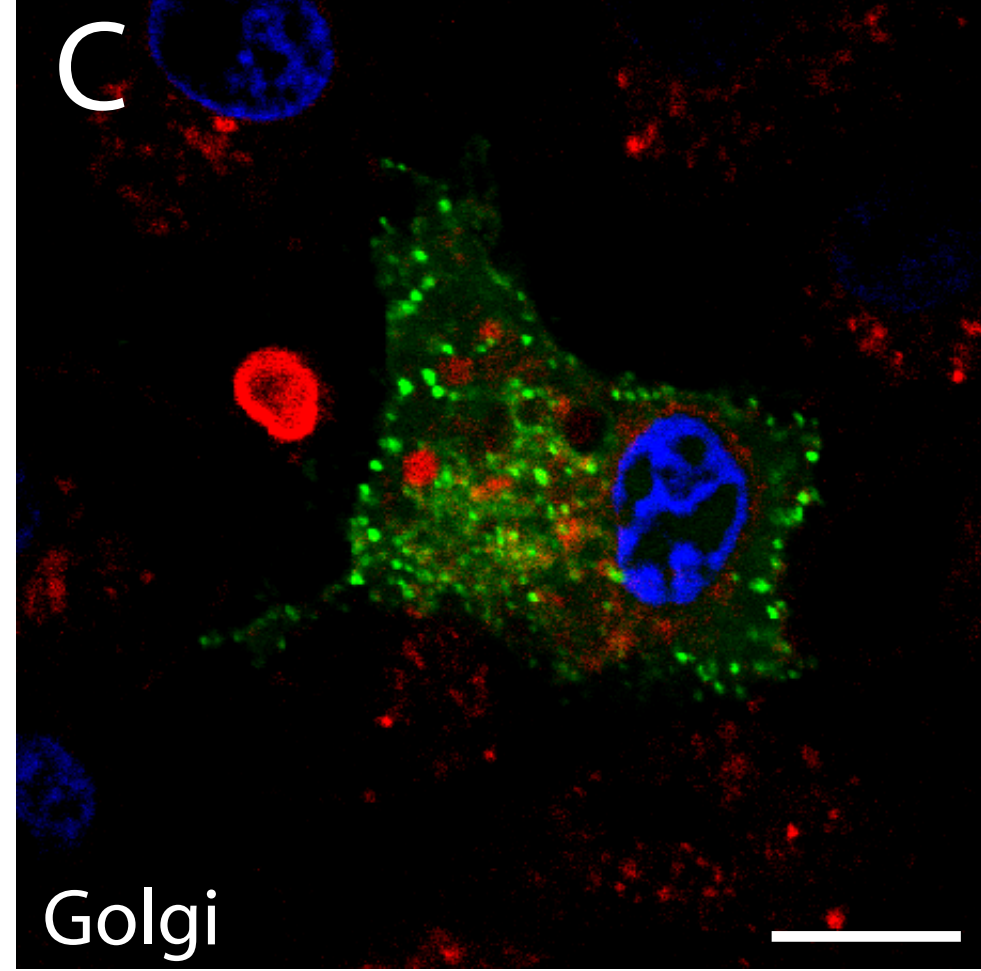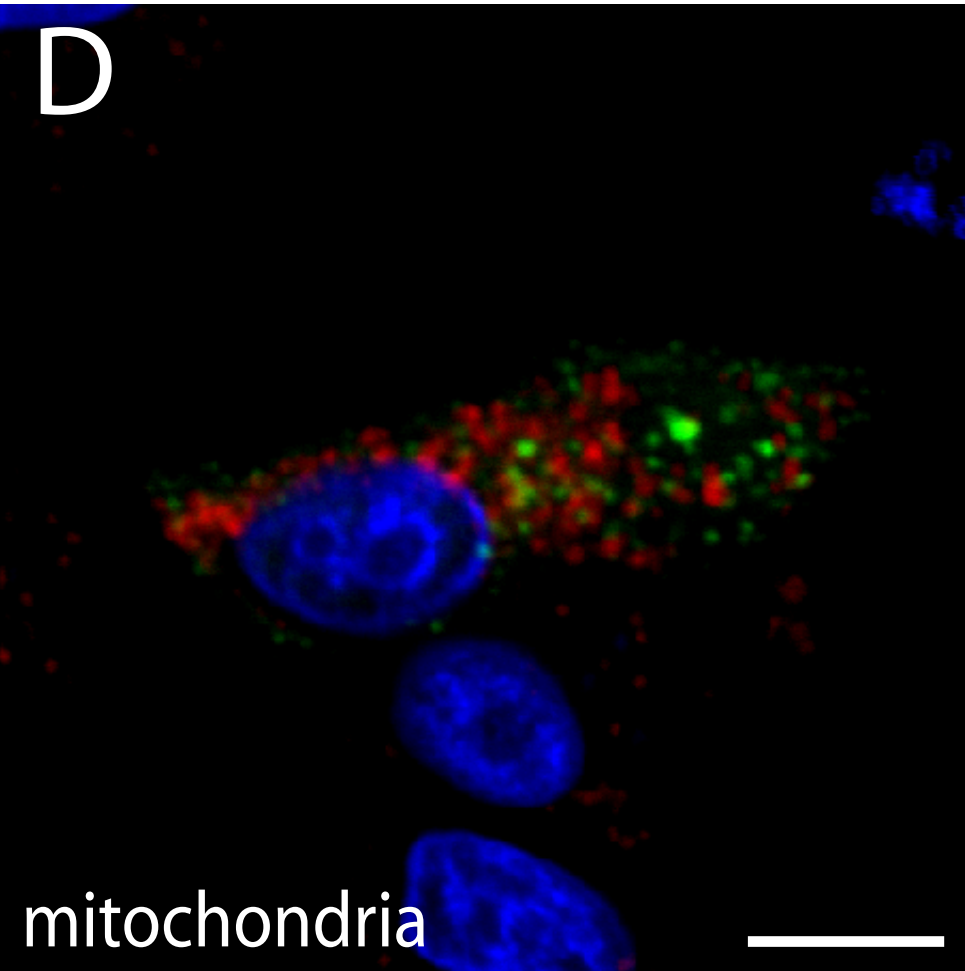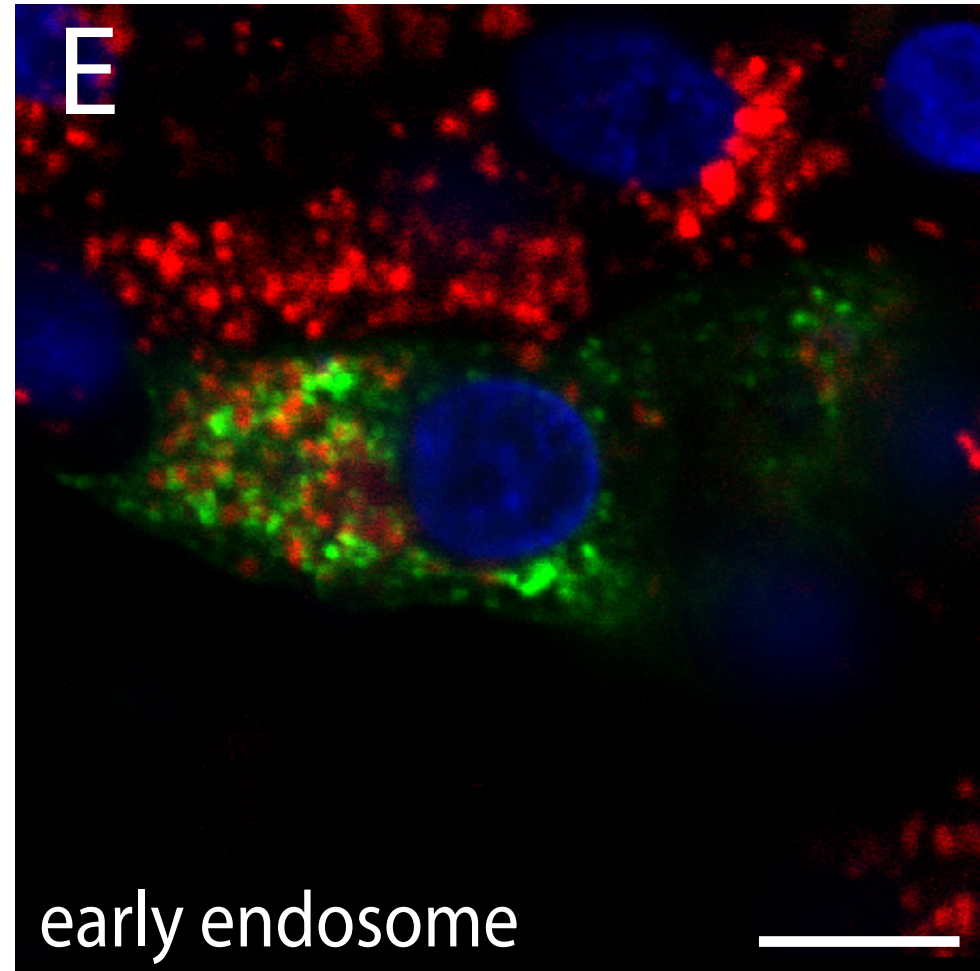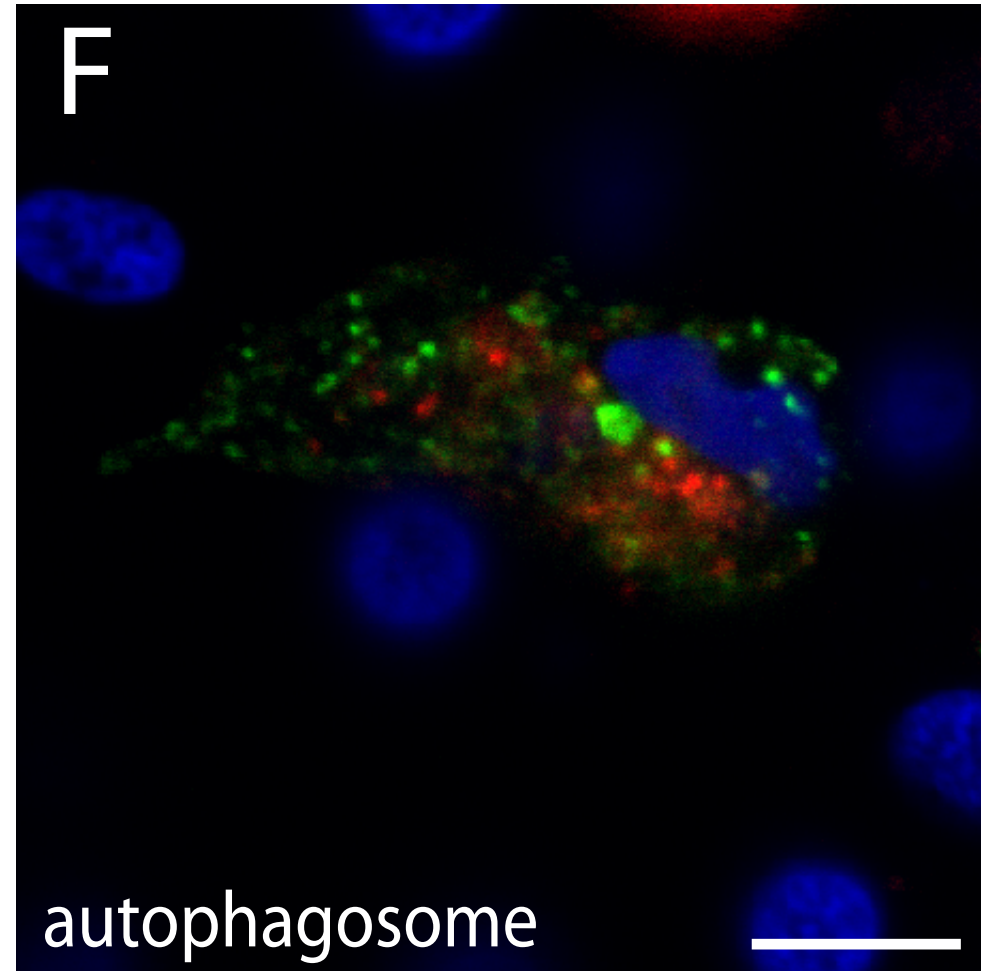

Supplement: 1471-2121-10-26-S2.pdf [file 1471-2121-10-26-S2.pdf]
